# Supplementary material
Source: Springer Nature journal article supplement (https://www.springermedizin.de/resource/supplementary/12967_2011_980_MOESM5_ESM.pdf/9577278)

A.

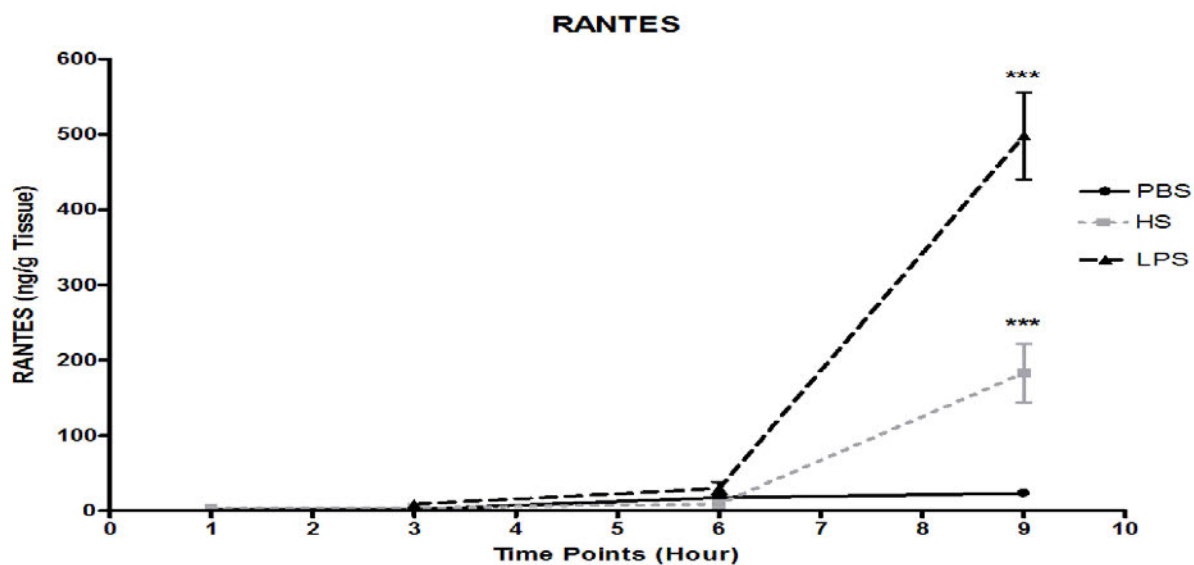

B.

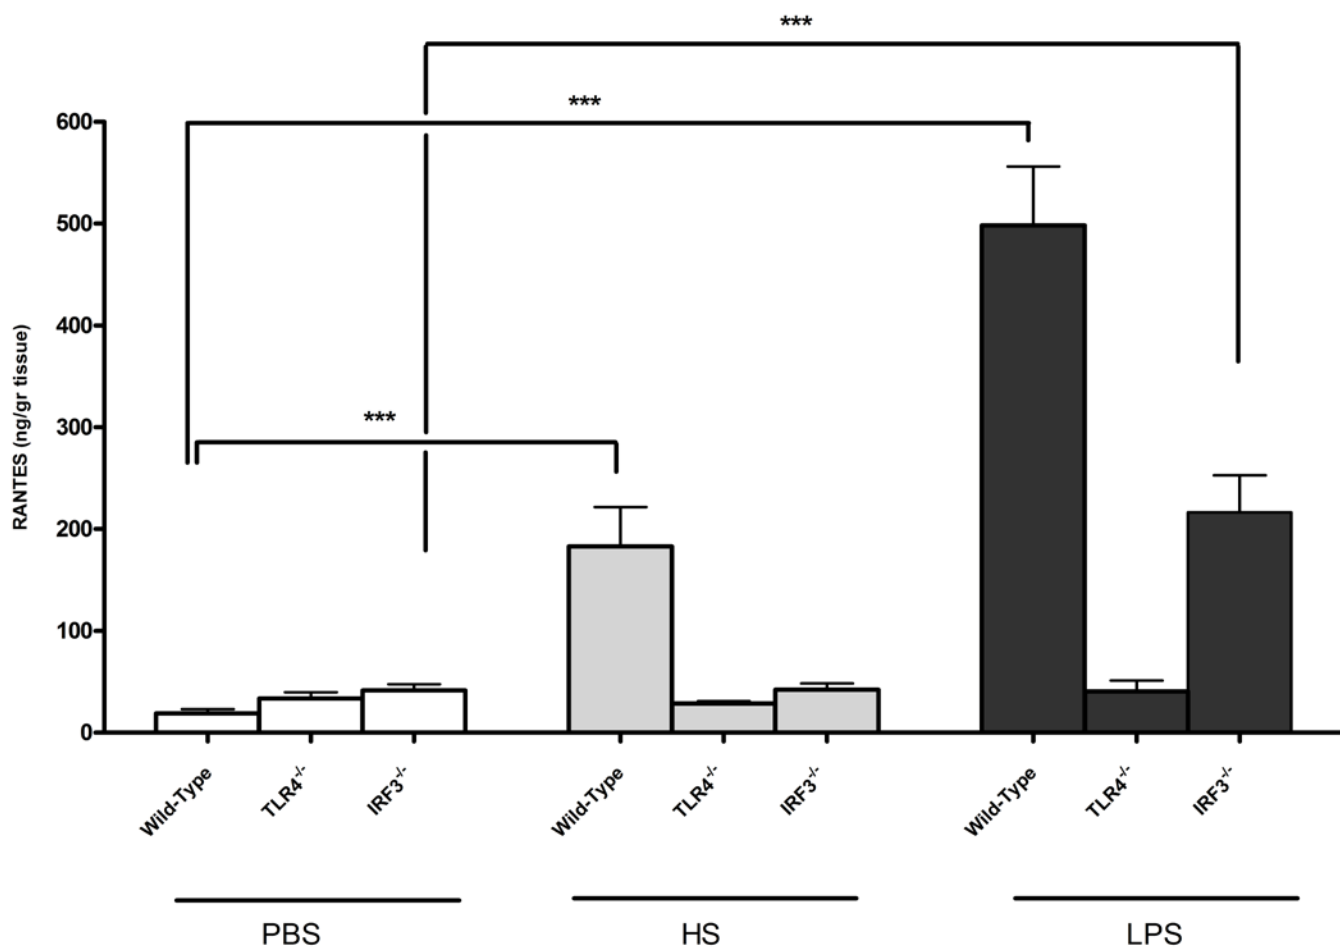

Supplement: MOESM5 [file 9577278]
